# Supplementary material
Source: PubMed Central journal article supplement (PMC8311944)
Supplement: 12916_2021_2055_MOESM1_ESM.pdf [file 12916_2021_2055_MOESM1_ESM.pdf]

**Additional File 1. Fraley et al. Humoral immune responses during SARS-CoV-2 mRNA vaccine administration in seropositive and seronegative individuals**

**Supplemental Table 1. Study participant demographics.**

**Supplemental Figure 1. Antibody binding to SARS-CoV-2 antigens at baseline in undiagnosed individuals.**

**Supplemental Figure 2. Higher dilution of seropositive plasma samples after vaccine for neutralization assay.**

**Supplemental Figure 3. IgG isotype responses to SARS-CoV-2.**

**Additional File 2. SARS-CoV-2 spike peptide sequences.**

**Additional File 3. Log<sub>2</sub> Median fluorescence intensity values for each SARS-CoV-2 peptide.**

**Additional File 4. Z-scores for each SARS-CoV-2 peptide.**

**Table S1. Study participant demographics**

|                  | <b>Seropositive</b> (COVID19+; N=42)                                                                                                                                         | <b>Seronegative</b> (COVID19-; N=152)                                                                                                                                         |
|------------------|------------------------------------------------------------------------------------------------------------------------------------------------------------------------------|-------------------------------------------------------------------------------------------------------------------------------------------------------------------------------|
| <b>Age</b>       | Median 38 years old<br>Range 25-73 years old                                                                                                                                 | Median 46 years old<br>Range 22-75 years old                                                                                                                                  |
| <b>Gender</b>    | Male: 5<br>Female: 37                                                                                                                                                        | Male: 46<br>Female: 105                                                                                                                                                       |
| <b>Race</b>      | White: 39<br>Black or African American: 0<br>American Indian or Alaska Native: 1<br>Asian: 2<br>Native Hawaiian or Other Pacific Islander: 0<br>Multiracial: 0<br>Unknown: 0 | White: 133<br>Black or African American: 3<br>American Indian or Alaska Native: 0<br>Asian: 7<br>Native Hawaiian or Other Pacific Islander: 0<br>Multiracial: 5<br>Unknown: 4 |
| <b>Ethnicity</b> | Hispanic or Latino: 5<br>Not Hispanic or Latino: 36<br>Unknown: 1                                                                                                            | Hispanic or Latino: 10<br>Not Hispanic or Latino: 129<br>Unknown: 13                                                                                                          |

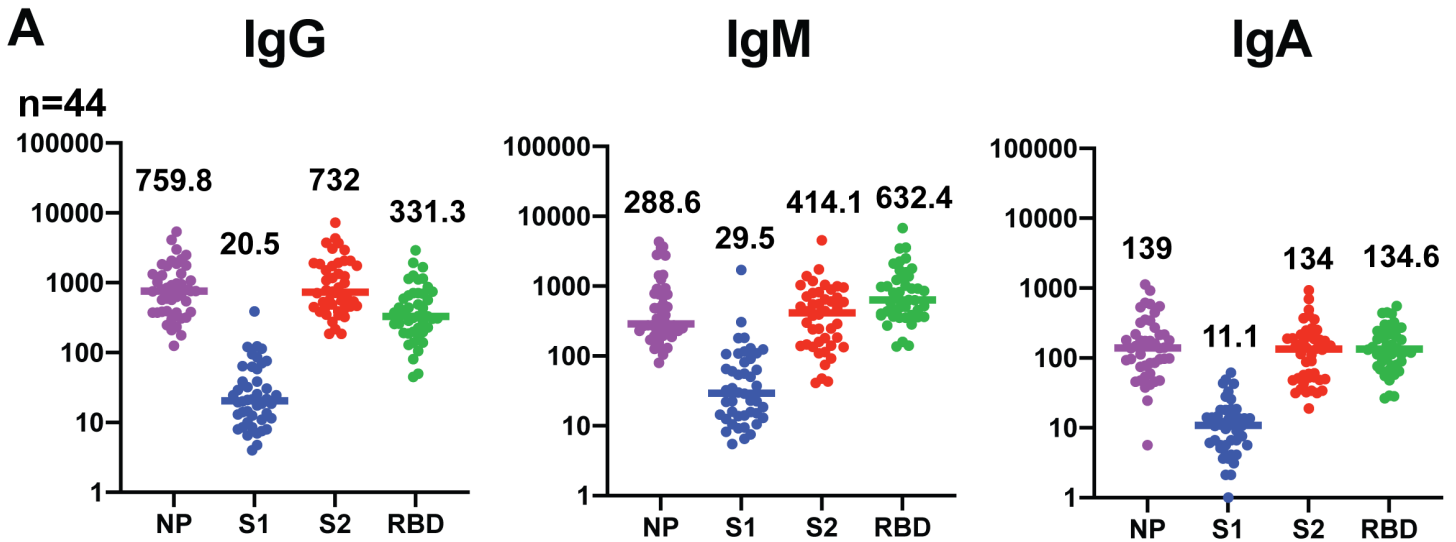

**B**

| Original ID   | S1          | S2           | RBD          | NP           |
|---------------|-------------|--------------|--------------|--------------|
| CME-131       | 26497.9     | 28374.6      | 25295        | 8793.2       |
| CME-169       | 22661.4     | 18878.1      | 24132        | 128.2        |
| CME-075       | 27573       | 27795        | 24792        | 8724         |
| CME-081       | 29879.5     | 32502        | 28946.5      | 22007        |
| CME-093       | 20391       | 26211        | 17823        | 23183        |
| CME-118       | 29406       | 33599.5      | 26251        | 23974        |
| <b>Median</b> | <b>16.8</b> | <b>886.7</b> | <b>218.2</b> | <b>482.9</b> |

**Supplemental Figure 1. Antibody binding to SARS-CoV-2 antigens at baseline in undiagnosed individuals.** (A) Multiplex bead-based antibody binding assay that measures the IgG, IgM or IgA antibody isotype-specific responses to 4 SARS-CoV-2 viral antigens (S1, S2, RBD and NP). Median fluorescent Intensity (MFI) is shown and background well subtraction has been used to remove nonspecific signal. Each dot represents an individual (n=44) that had blood collected prior to the COVID-19 pandemic in 2019. Bars represent group median and median values displayed above groups. (B) Net MFI for the SARS-CoV-2 antigens (S1, S2, RBD, NP) for the six individuals identified that may have undiagnosed/asymptomatic prior infection at baseline. The median MFI for the seronegative group at baseline is shown at the bottom.

## Blocking of binding of receptor-binding domain to ACE2 Seropositive (dilution of samples)

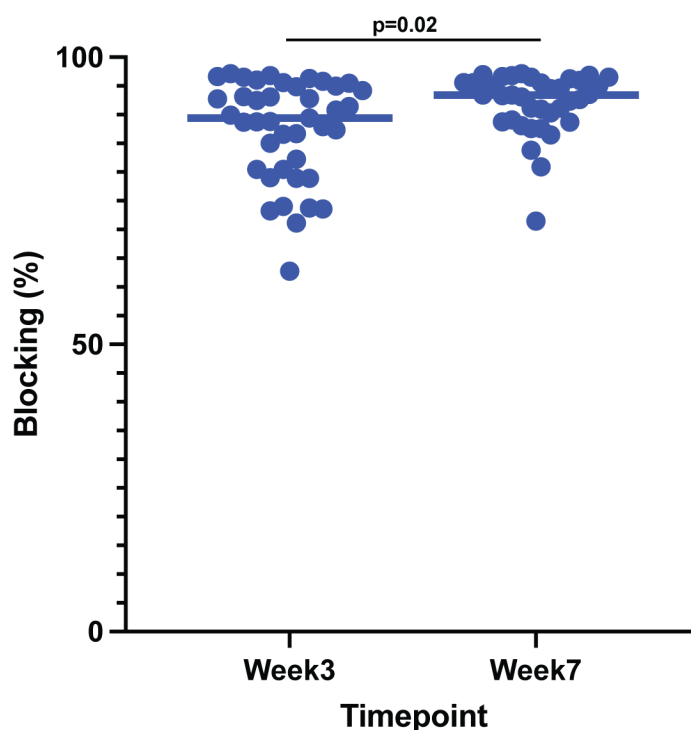

**Supplemental Figure 2. Higher dilution of seropositive plasma samples after vaccine for neutralization assay.** Neutralization antibody proxy assay that determines the level of antibodies that block the RBD-ACE2 receptor binding expressed as the percentage of binding that was blocked relative to control with no plasma (representing maximum binding). Plasma was diluted 1:100 for these samples. The assay threshold for positivity was 30%. Each point represents an individual at baseline before vaccine, 3 weeks after the first dose of vaccine (week 3) or 4 weeks after the second dose (week 7). Bars represent group median. Statistical tests for significant differences between groups were unpaired, two-tailed Wilcoxon-Mann-Whitney with a significant threshold of  $P < 0.05$ .

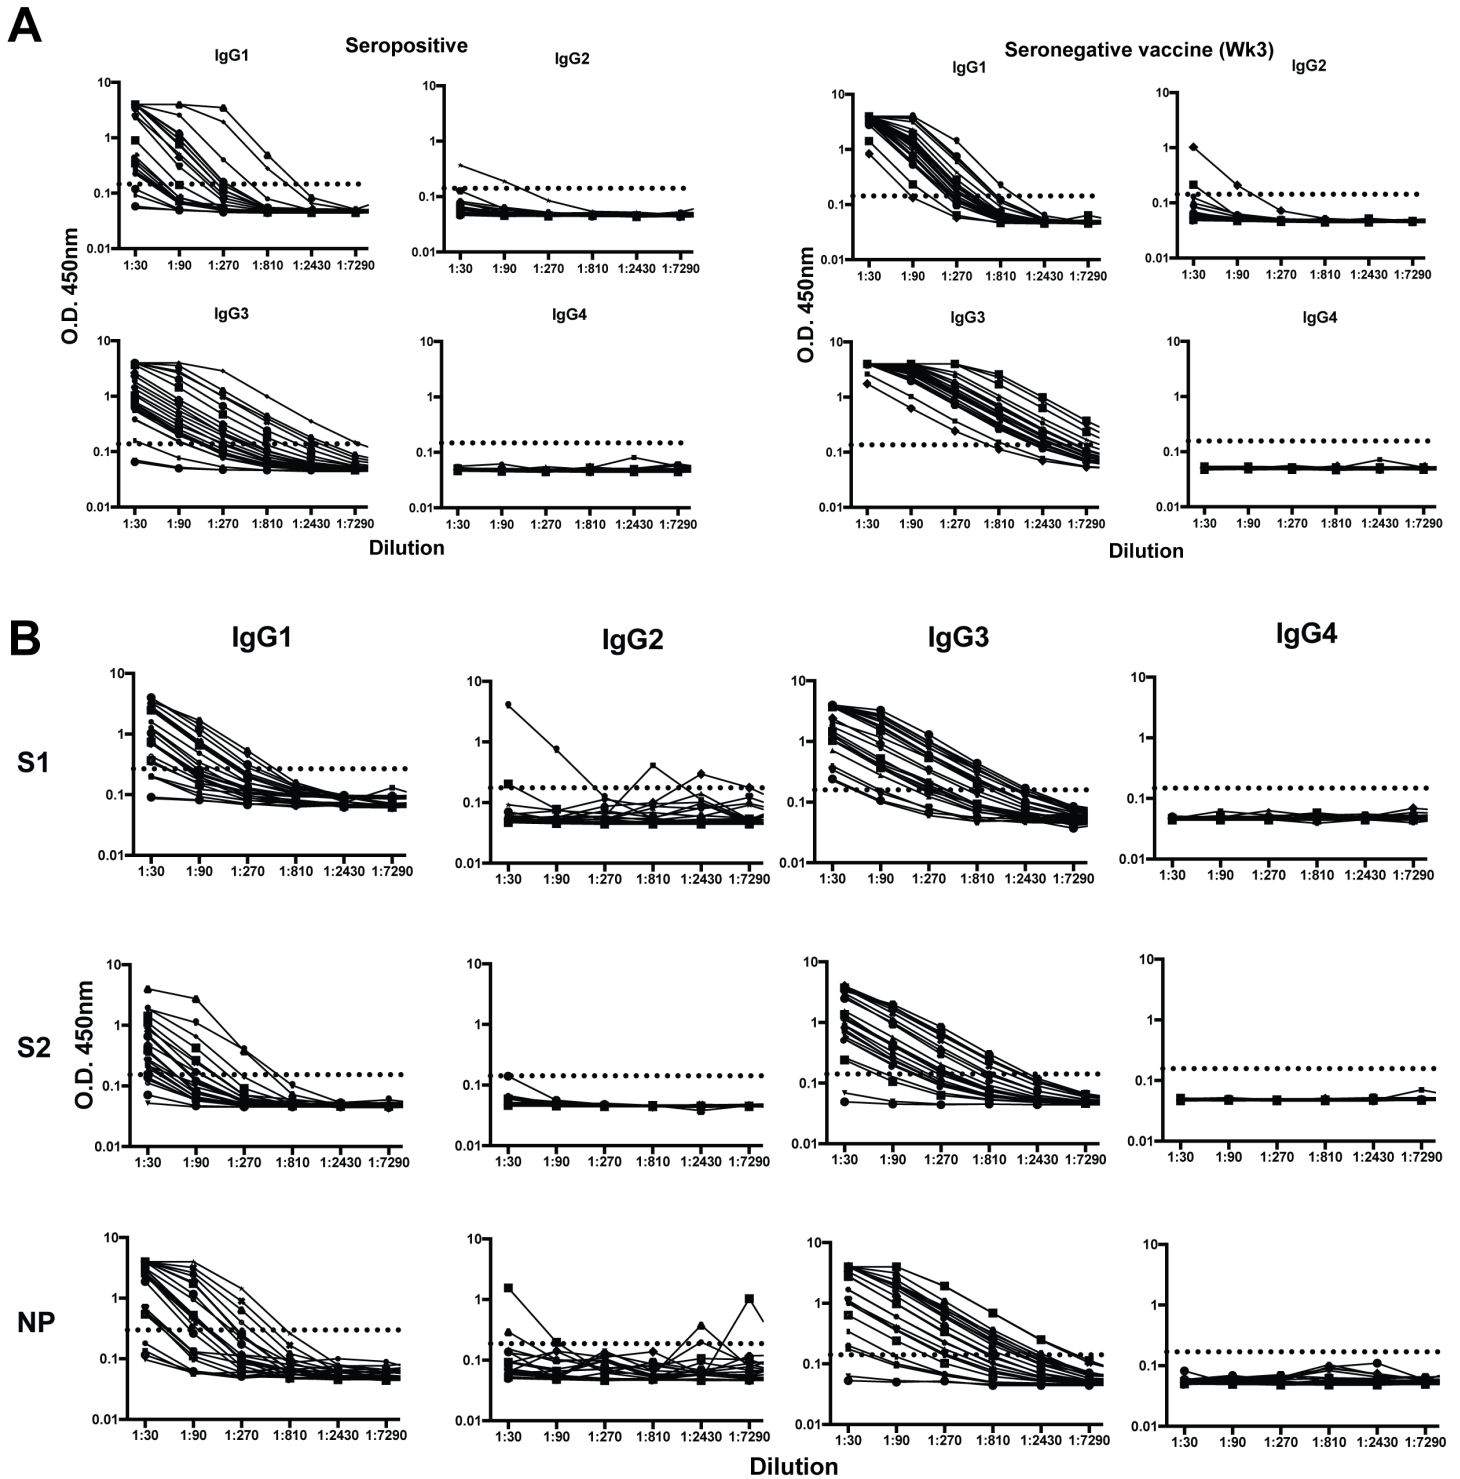

**Supplemental Figure 3. IgG subclass responses to SARS-CoV-2. (A-B)** O.D 450nm measurements after ELISA for each dilution for (A) RBD and (B) S1, S2 and NP proteins for each IgG subclass. Endpoint titers shown in Figure 4.
